1 **Functional brain network topology across the menstrual cycle is sex hormone dependent and**  
2 **correlates with the individual well-being**

3

4 Marianna Liparoti<sup>1</sup>, Emahnuel Troisi Lopez<sup>1</sup>, Laura Sarno<sup>2</sup>, Rosaria Rucco<sup>1,3</sup>, Roberta Minino<sup>1</sup>,  
5 Matteo Pesoli<sup>1</sup>, Giuseppe Perruolo<sup>4,5</sup>, Pietro Formisano<sup>4,5</sup>, Fabio Lucidi<sup>6</sup>, Giuseppe Sorrentino<sup>\*1,3,7</sup>,  
6 Pierpaolo Sorrentino<sup>3,8</sup>

7

8 <sup>1</sup> Department of Motor Sciences and Wellness, University of Naples “Parthenope”, Naples, Italy

9 <sup>2</sup> Department of Neurosciences, Reproductive Science and Dentistry, University of Naples “Federico II”,  
10 Naples, Italy

11 <sup>3</sup> Institute of Applied Sciences and Intelligent Systems, CNR, Pozzuoli, Italy

12 <sup>4</sup> Department of Translational Medicine, University of Naples “Federico II”, Naples, Italy

13 <sup>5</sup> URT “Genomic of Diabetes” of Institute of Experimental Endocrinology and Oncology, National Council  
14 of Research, CNR, Naples, Italy

15 <sup>6</sup> Department of Developmental and Social Psychology, University of Rome "La Sapienza", Rome, Italy

16 <sup>7</sup> Hermitage Capodimonte Clinic, Naples, Italy

17 <sup>8</sup> Institut de Neurosciences des Systèmes, Aix-Marseille Université, Marseille, France

18

19 <sup>^</sup>The authors contributed equally

20 <sup>\*</sup> Corresponding author

21 Prof. Giuseppe Sorrentino

22 Department of Motor Sciences and Wellness

23 University of Naples “Parthenope”

24 Naples, Italy

25 [giuseppe.sorrentino@uniparthenope.it](mailto:giuseppe.sorrentino@uniparthenope.it)

26 **Abstract**

27 The menstrual cycle is known to influence the behaviour. The neuronal bases of this phenomenon  
28 are poorly understood. We hypothesized that hormones, might affect the large-scale organization of  
29 the brain functional networks and that, in turn, such changes might have behavioural correlates in  
30 terms of the affective state. To test our hypothesis, we took advantage of magnetoencephalography  
31 to investigate brain topology in early follicular, ovulatory and luteal phases, in twenty-four  
32 naturally-cycling women without signs of anxiety and/or depression. We show that in the alpha  
33 band the betweenness centrality (BC) of the right posterior cingulate gyrus (PCG) during the  
34 ovulatory phase is increased and the rise is predicted by the levels of estradiol. We also demonstrate  
35 that the increase in the BC is related to improved subjective well-being that, in turn, is correlated to  
36 the estradiol levels. The increased topological centrality of the PCG during the ovulatory phase  
37 could have implications in reproductive psychology.

## 38 **Introduction**

39 The brain, over the course of a lifetime, undergoes continuous and dynamic changes on multiple  
40 time scales<sup>1</sup>, both structurally and functionally. These changes can be induced both by pathological  
41 processes<sup>2-4</sup>, as well as physiological and environmental factors including, as an example, dietary  
42 or sleeping habits<sup>5,6</sup>.

43 Hormonal modulation is also capable of inducing changes in both structure and function. In  
44 particular, sex hormones play a pivotal role in the modulation of behaviour. The patterns of sex  
45 hormones undergo physiological changes throughout life. As soon as the prenatal period, the  
46 hypothalamic-pituitary-gonadal axis, produces gender differentiation. Phoenix et al.<sup>7</sup> hypothesized  
47 that testosterone acts on the brain, causing permanent changes which affect neurobehavioral  
48 development. Sexual differentiation of the brain is not limited to the prenatal development but  
49 extends throughout puberty. During puberty, the hormonal changes contribute to morphological  
50 variations of the cortical and subcortical regions<sup>8-10</sup> involved in sensorimotor processing, such as  
51 the thalamus and the caudate, as well as areas involved in emotion and memory processes, such as  
52 the amygdala and the hippocampus. It has been proposed that sex hormones fluctuations during  
53 puberty might be responsible of gender-related differences in the brain functioning<sup>11</sup>. Finally, a  
54 possible role of sex hormones on brain activity has been invoked in aging, with lower estrogens  
55 negatively affecting cognitive functions and memory<sup>12</sup>.

56 Unlike puberty or menopause, which are unique and non-repeatable processes, the menstrual cycle  
57 is the only sex hormone-related phenomenon that repeats itself cyclically, with periodical,  
58 coordinated variations of multiple hormones including estradiol, progesterone, Follicular Stimulant  
59 Hormone (FSH) and Luteinizing Hormone (LH). Such variations can induce a number of physical  
60 (acne, breast pain, cramps, headaches), vegetative (sleep and eating disorders)<sup>13,14</sup> and  
61 psychopathological changes (anxiety, depression, moodiness)<sup>15</sup>.

62 A large number of women suffer from sex hormone dependent depressive disorders, including  
63 postpartum depression, peri-menopausal depression and premenstrual dysphoric disorders

64 (PMDD)<sup>16,17</sup>. PMDD is characterized by cyclic, debilitating cognitive, somatic and affective  
65 symptoms (depression, irritability, mood lability, anxiety) which occur during the luteal phase,  
66 abate at menses, and greatly affect quality of life<sup>18</sup>. PMDD, which is now categorized as a new  
67 depressive disorder in the Diagnostic and Statistical Manual of Mental Disorders (DSM–5)  
68 (America Psychiatric Association), affects approximately 5-8% of women of reproductive age. An  
69 additional 30-40% of women suffer from milder, yet clinically significant, premenstrual symptoms  
70 (PMS), that also significantly impact the quality of life<sup>19</sup>. Finally, the knowledge about menstrual  
71 cycle-related emotional experiences without clinical relevance is sparse and anecdotal.  
72 Despite the overwhelming evidence of the behavioural effects of the menstrual cycle, very little  
73 evidence is available on what the potential mechanisms might be. Classically, the connection  
74 between behavioural features and brain activity has been studied based on the assumption that  
75 specific brain areas serve specific functions. This approach successfully explains, and to some  
76 extent predicts, the impairment of relatively simple functions such as motor or sensory ones<sup>20</sup>.  
77 However, it has not been possible to identify specific brain locations responsible for higher  
78 cognitive function. Hence, for the understanding of higher mental functions it is necessary to adopt  
79 a more integrated approach, where the brain description is not limited to the properties of individual  
80 areas, but includes also structural and functional relationship among them, forming a tightly  
81 regulated network giving rise to the emergence of complex behaviour<sup>21</sup>. In the last decades, new  
82 techniques and higher available computational power made it possible to analyse brain activity non-  
83 invasively at the whole-brain level, typically through the prism of graph theory, where nodes of the  
84 graph represent brain areas, and edges represent statistical dependencies among the signals  
85 generated by such areas. These techniques can be applied to the BOLD signal derived from  
86 functional magnetic resonance (fMRI), as well as to neurophysiological (electroencephalography -  
87 EEG- and magnetoencephalography - MEG) signals.  
88 Due to the abovementioned physiological cyclical fluctuations, both with respect to hormones  
89 levels and behaviour, the different phases of menstrual cycle can be exploited to study the

90 relationship between sex hormones level, behavioural changes and functional brain correlates.  
91 However, the brain network research applied to the menstrual cycle highlights conflicting  
92 evidences. Using functional magnetic resonance (fMRI), Petersen et al.<sup>22</sup> have demonstrated the  
93 influence of sex hormones during follicular and luteal phases on two different functional network,  
94 the anterior portion of the default mode network (aDMN) and the executive control network (ECN).  
95 In detail, comparing the brain networks in the two phases, they found that during the follicular  
96 phase, the connectivity of both the left angular gyrus within the aDMN and the right anterior cortex  
97 within the ECN were increased. Arélin et al.<sup>23</sup> investigated the associations between ovarian  
98 hormones and eigenvector centrality (EC) in resting state functional magnetic resonance imaging  
99 (rs-fMRI) across menstrual cycle, and found a positive correlation between progesterone and EC in  
100 the dorsolateral prefrontal cortex, sensorimotor cortex and the hippocampus, suggesting the  
101 modulator role of progesterone on areas involved in memory regulation. In contrast, both  
102 Hjelmervik et al.<sup>24</sup> and De Bond et al.<sup>25</sup> did not find any changes in rs-fMRI brain connectivity in  
103 different menstrual cycle phases. The influence of sex hormones on brain connectivity was also  
104 studies through resting state electroencephalography (EEG) measurements, which provides lower  
105 spatial and higher temporal resolution as compared to fMRI. Brötzner et al.<sup>26</sup> have associated the  
106 alpha frequency oscillations with menstrual cycle phases and hormones level, and found the highest  
107 alpha frequency during the luteal phase and the lowest alpha frequency during the follicular phase,  
108 with the change negatively correlated to the and estradiol levels, suggesting that the latter modulates  
109 the resting state activity in the alpha band. Finally, the correlation between brain network changes  
110 and behavioural modification typical of PMDD remains poorly explored. For example, Syan et al.<sup>27</sup>  
111 examined rs-fMRI in woman with PMDD and failed to show differences in terms of brain network  
112 properties.  
113 MEG is a non-invasive neurophysiological brain imaging method devised to measure the magnetic  
114 fields produced by the electrical activity of neuronal cells. Unlike the electric fields in the EEG, the  
115 magnetic signals are not distorted by the tissue layers surrounding the brain parenchyma, allowing

116 high spatial accuracy<sup>28</sup>. Furthermore, the fact that the recorded signal is not mediated by the levels  
117 of oxygenation, as it is the case with BOLD signals, allows MEG to achieve high temporal  
118 resolution, and provide an estimate of the neuronal activity across a broad frequency spectrum.  
119 Ultimately, at present MEG is the only non-invasive brain imaging technique having at same time a  
120 sufficiently good spatial (2-5 mm) and excellent temporal (~1 msec) resolution<sup>29</sup>.  
121 In this study we hypothesized that the brain network rearranges periodically along the menstrual  
122 cycle as a function of the levels of hormones. and that these changes are associated to modifications  
123 of the affective condition, even in the absence of overt clinical signs of anxiety and/or depression.  
124 To test our hypothesis, we exploited MEG to investigate the brain topology in early follicular,  
125 ovulatory and luteal phase, in twenty-four healthy, naturally-cycling women without pre-menstrual  
126 symptoms and with no signs of anxiety and/or depression. More precisely, we estimated the links  
127 between areas by invoking synchronization as a mechanism of communication<sup>30</sup>, and applied a  
128 novel metric, the Phase Linearity Measurement (PLM)<sup>31</sup>, to estimate the degree of synchronization.  
129 Once a frequency specific adjacency matrix (based on the PLM) was obtained, it was then filtered  
130 using the Minimum Spanning Tree (MST) algorithm, as to allow an unbiased comparison of  
131 topological properties between groups<sup>32,33</sup>. Furthermore, we correlated brain topological changes  
132 along the menstrual cycle with the corresponding changes in hormone levels (estradiol,  
133 progesterone, LH, FSH), as well as to the affective condition. The correlation between the hormonal  
134 levels and the affective condition along the menstrual cycle was investigated as well. Finally, to  
135 explore the causal relationship between hormonal levels and topological properties, we used a linear  
136 model to predict the topological properties from the hormones level.

137

## 138 **Results**

139 Twenty-six women were analysed, obtaining brain topological information (computed from MEG  
140 data), blood hormone levels and psychological data at three time points across the menstrual cycle.  
141 Specifically, the participants were observed in the early follicular (T1), ovulatory (T2) and luteal

142 (T3) phases. Two women were excluded because the BDI test value fell below the cut-off, therefore  
143 all data analysis were conducted on twenty-four women.

144

145 **Analysis of the topological parameters.** In order to ascertain possible changes of brain topology  
146 across the menstrual cycle, global and nodal parameters of the brain networks (see Methods section)  
147 at early follicular, ovulatory and luteal phases have been calculated. The nodal analysis showed  
148 significant difference in the betweenness centrality (BC) of the right posterior cingulate gyrus  
149 (rPCG) ( $\chi^2$  (df = 2, N = 24) = 15.2500,  $p = 4.8 \times 10^{-4}$ ,  $p_{\text{FDR}}$  (False Discovery Rate – see methods  
150 section) = 0.043), in the alpha band. In detail, the post-hoc analysis showed significantly higher BC  
151 in the rPCG during the ovulatory phase, as compared to the follicular ( $p = 0.0003$ ) and luteal ( $p =$   
152 0.0055) phases (Fig. 1).

153 With regard to the global topological parameters, the leaf fraction (Lf, a measure of network  
154 integration- see discussion) ( $\chi^2$  (df = 2, N = 24) = 10.7500,  $p = 0.0046$ ,  $p_{\text{FDR}} = 0.009$ ) and the tree  
155 hierarchy (Th, a measure of the trade-off between a well-connected network that is also resilient to  
156 targeted attacks - see discussion) ( $\chi^2$  (df = 2, N = 24) = 12.3333,  $p = 0.0021$ ,  $p_{\text{FDR}} = 0.008$ ) were  
157 reduced in the alpha band. More specifically, the post-hoc analysis revealed a reduction in the  
158 network integration in ovulatory phase as compared to both the follicular (Lf  $p = 0.016$ ; Th  $p =$   
159 0.032) and the luteal (Lf  $p = 0.004$ ; Th  $p = 0.006$ ) phases. No statistically significant difference,  
160 after FDR correction, was found in any other nodal and global parameter, nor in any other  
161 frequency band. The topological parameters, that showed significant variations during the menstrual  
162 cycle (BC in the rPCG, Lf and Th) became parameter of interest for follow-up correlation and linear  
163 model analyses.

164

165 **Topological brain network parameters and hormone blood levels.** To explore the possible  
166 influence of sex hormones on the topological brain configuration throughout the menstrual cycle,  
167 Spearman's correlation analyses between the variations ( $\Delta$  T1-T2 and  $\Delta$  T2-T3) of the brain

168 network topological parameters and the concurrent variations in the hormonal levels have been  
169 studied (Fig. 2). A statistically significant direct correlation between the  $\Delta$  values of the BC of the  
170 rPCG in the alpha band, and those of estradiol ( $r = 0.67$ ,  $p = 3.6 \times 10^{-7}$ ,  $p_{\text{FDR}} = 1.4 \times 10^{-6}$ ), LH ( $r =$   
171  $0.50$ ,  $p = 0.0003$ ,  $p_{\text{FDR}} = 0.0006$ ) and FSH ( $r = 0.43$ ,  $p = 0.0023$ ,  $p_{\text{FDR}} = 0.0031$ ). No correlation was  
172 demonstrated between the global topological parameters and hormonal levels.

173

174 **Topological brain network parameters and psychological scores.** To study whether the  
175 topological changes that we have observed could be linked to the well documented changes of the  
176 affective condition across the menstrual cycle, Spearman's correlation analysis between the brain  
177 network parameters and the psychological scores were carried out (Fig. 3). The analysis showed a  
178 significant direct correlation between the  $\Delta$  values of the BC of the rPCG and the  $\Delta$  values of two of  
179 the six subdomains of the well-being test, namely the environmental mastery ( $r = 0.40$ ,  $p = 0.004$ ,  
180  $p_{\text{FDR}} = 0.013$ ) and the self-acceptance ( $r = 0.42$ ,  $p = 0.002$ ,  $p_{\text{FDR}} = 0.013$ ). No correlation was  
181 demonstrated with the global topological parameters.

182

183 **Hormone blood levels and psychological scores.** To analyse the possible association between sex  
184 hormones changes and the well-known affective modifications occurring during the menstrual  
185 cycle, Spearman's correlation analysis between the  $\Delta$  values of the hormonal levels and those of the  
186 psychological scores was performed (Fig. 4). A statistically significant correlation between estradiol  
187 and environmental mastery ( $r = 0.44$ ,  $p = 0.001$ ,  $p_{\text{FDR}} = 0.034$ ) was observed.

188

189 **Multilinear model analysis.** To further explore the causal relationship occurring between changes  
190 of topological properties in the brain and hormonal levels, we build a linear model to predict the  
191 changes ( $\Delta$  T1-T2 and  $\Delta$  T2-T3) in the BC in the rPCG, and in the Lf and the Th, as a function of  
192 the changes in the hormonal levels, using the leave-one-out cross-validation approach (LOOCV)  
193 (see Methods for details) (Fig. 5). Hormone blood level variations ( $\Delta$  T1-T2 and  $\Delta$  T2-T3) of



194 estradiol, progesterone, LH, FSH scores were included into an additive multilinear model, together  
195 with nuisance variables (age, education, cycle length). We found that the model yielded significant  
196 predictions of the BC of the rPCG ( $R^2 = 0.51$ ), with estradiol being a significant predictor for the  
197 model ( $p < 0.001$ ), with positive beta coefficients. The prediction of the model and the distribution  
198 of the residuals (computed through LOOCV) are shown in Fig. 5, panels B and C. The same model  
199 was applied to global topological parameters, but no significant results were obtained.

200

## 201 **Discussion**

202 In the present study, we set out to test the hypothesis that sex hormones changes, as they occur  
203 across the menstrual cycle, may affect the topological configuration of brain networks, as well as  
204 modulate the frequently observed mood changes. We showed that during the menstrual cycle the  
205 topological features of the brain network undergo profound rearrangements under the effect of sex  
206 hormones, as highlighted by changes in both nodal and global topological parameters. In particular,  
207 we showed in the alpha band, during the ovulatory phase, increased BC in the right posterior  
208 cingulate gyrus and reduced Lf and Th, as compared to both the follicular and luteal phases. The  
209 increase of the BC of the right posterior cingulate gyrus was positively correlated with the changes  
210 in the blood levels of estradiol, LH and FSH. Furthermore, though a multilinear model, we showed  
211 that nearly 50% of the variance of the changes of the BC can be explained by the estradiol. We also  
212 demonstrated that the increase in the BC was related to improved subjective well-being, as  
213 suggested by the positive correlation to the scores of the environmental mastery and the self-  
214 acceptance domains within the well-being test. Finally, we showed that the environmental mastery  
215 domain of the well-being test was also correlated to the estradiol levels.

216 The PCG is described as “an enigmatic cortical region”<sup>34</sup>. If, on the one hand, the high metabolic  
217 expenditure and the number of cortical and subcortical connections point at the PCG as structural  
218 and functional hub, on the other hand, growing evidence shows that the PCG tends to deactivate in  
219 response to attention demanding tasks<sup>35</sup>. Accordingly, the PCG displays increased activity when the

220 subject is involved in internally-directed task such as retrieving autobiographical memories,  
221 planning for the future or wandering freely with the mind<sup>36-38</sup>. Recent studies suggest that the PCG  
222 may play a crucial role in the stepwise mechanisms of integration of specialized perceptive  
223 processes (i.e. visual, auditory or sensory) into higher levels of abstraction. Other works suggest  
224 that the PCG may play a role in assessing the significance of decision outcome, being important in  
225 balancing between risk-prone and risk-adverse behaviours<sup>34</sup>.

226 It is noteworthy that the PCG change is not symmetric. This fact may be associated with a different  
227 influence of the sex hormones on the right and left PCG, possibly modulating the expression of  
228 affective behavioural styles. Hwang et al.<sup>39</sup> demonstrated an asymmetry on the way the brain is  
229 modulated by sex hormones during the menstrual cycle. In particular, higher right frontal activity  
230 was observed during the ovulation phase, and a higher left activity during the menstruation phase.  
231 However, they found this left-right asymmetry in the frontal regions of the brain, while our data  
232 points at the posterior brain regions. Nonetheless, it is interesting to note that the DMN areas  
233 possess long-distance projections to the anterior cingulate areas via the PCG<sup>40</sup>. Furthermore, has  
234 been shown that the asymmetry at rest between the right and left sides of brain represents a reliable  
235 measure of individual affective style<sup>41</sup>. In particular, greater alpha activity in the right regions  
236 corresponds to a personality trait sensitive to negative affective stimuli, while greater alpha activity  
237 on the left corresponds to a personality trait sensitive to positive affective stimuli.

238 Furthermore, we showed a statistical significant reduction of the Lf and the Th during the ovulatory  
239 phase, as compared to the follicular and luteal phases. This data might suggest a shift towards a less  
240 centralized organization of the brain network<sup>42</sup> in which the information flow is less reliant on any  
241 single node, with consequent improved resiliency to targeted attacks<sup>32,33</sup>. These results could be  
242 summarized as a better global efficiency which is an expression of an optimal organization of the  
243 brain network during the ovulatory phase, in terms of an optimal trade-off between efficient  
244 communication and resiliency.

245 The direct correlation between the BC changes in the rPCG and the variations of estradiol, LH and  
246 FSH suggests that the monthly hormonal fluctuations affect the role of this area within the brain  
247 networks. Our results suggest that the sex hormones changes, and specifically those involving  
248 estradiol, LH and FSH, have a substantial impact on the functional architecture of the brain  
249 networks. Besides the evidence of higher BC in the rPCG during the ovulation phase, we also show  
250 that the changes of BC are linearly proportional to the changes of the blood estradiol level. This fits  
251 with the fact that estradiol, LH and FSH levels peak during the ovulatory phase.

252 The multilinear model confirmed that there is a relationship between the topological variation and  
253 the hormonal fluctuations that occur during the menstrual cycle, in fact nearly 50% of the variance  
254 of the changes of the BC in the PCG during the menstrual cycle can be explained by the changes in  
255 estradiol. Multiple works have tried to disentangle hormone-specific influences on the brain  
256 networks. However, the literature is largely inconsistent, even when limiting oneself to the effects  
257 of hormones on brain connectivity alone. Several studies have shown the involvement of the  
258 estradiol on both the structure and the function of the brain. In particular, it has been observed that  
259 estradiol affects the activity of the right anterior hemisphere<sup>39</sup>. Pletzer et al.<sup>43</sup> demonstrated that the  
260 left hippocampus is highly activated during the pre-ovulatory phase, while its activation drops  
261 during the luteal phase, suggesting that estradiol and progesterone have opposite effects on the  
262 hippocampus. Furthermore, MRI studies have reported increased grey matter volumes in the  
263 hippocampus during the pre-ovulatory phases<sup>43,44</sup>. A resting state MRI study found a significant  
264 positive correlation between progesterone (but not estradiol) and the Eigenvector centrality in the  
265 dorsolateral prefrontal cortex in a single woman scanned 32 times across four menstrual cycles<sup>23</sup>.

266 However, further studies did not find any correlation between resting state activity and neither  
267 progesterone nor estradiol<sup>22</sup>. Very recently, Pritschet et al.<sup>45</sup> demonstrated, in a very elegant study,  
268 the crucial effect of estradiol on brain network. The authors performed a dense-sampling protocol,  
269 scanning the same woman for 30 consecutive days. One year later the same woman repeated the  
270 protocol while she was under hormonal therapy, as to selectively suppress progesterone synthesis,

271 while leaving estradiol unaffected. In the second experimental setting, the authors were able to  
272 confirm the previous results.

273 Our observation about the positive correlation between the increase in BC, suggesting a greater  
274 topological centrality of the rPCG within the cerebral network, and higher levels of estrogen, LH  
275 and FSH, does not find an immediate and unambiguous explanation. Albeit within a purely  
276 speculative framework, we notice that the greater centrality of the PCG is coupled to the levels of  
277 estradiol, LH and FSH, showing that the role of this region within the network is more prominent  
278 during the moment of fertility. Observing this phenomenon from an evolutionistic perspective, one  
279 could think that, when fertility is at its peak a quick and effective evaluation of the relative risks and  
280 rewards associated to the potential mate would be adaptive. The PCG might have implications in  
281 the top-down control in decision making as in the choice of the partner<sup>46,47</sup>.

282 Several studies support this hypothesis. For example, an event-related potential, source  
283 reconstructed EEG study<sup>48</sup> reveals that the strongest activations were in the PCG when presenting  
284 scenes in which 2 people performed “affective” actions, while the superior temporal sulcus, an area  
285 included in the mirror neuron system, was activated by cooperative scenes. In fact, it is well  
286 established that the PCG is involved in emotion processing<sup>49,50</sup>, in the subjective evaluation of  
287 events, and in the attribution of their emotional significance. Furthermore, this observation seems to  
288 be gender-specific, since women show improved comprehension of unattended social scenes as  
289 compared to men. Rupp et al.<sup>51</sup> used fMRI to measure brain activity in twelve women as they  
290 evaluated pictures of masculinized or feminized male faces, during both the follicular and luteal  
291 phase. They found that the brain regions involved in face perception, decision making and reward  
292 processing, including the PCG, responded more strongly to masculinized faces as compared to  
293 feminized ones. Additionally, the authors showed that such process was influenced by the hormonal  
294 levels. More specifically, the PCG activation was positively predicted by estradiol (and  
295 testosterone). They propose that this mechanism may have a role in the women’s cognitive

296 processes underlying the decision making process in partner choice. Further extensive literature is  
297 available to sustain this hypothesis<sup>52-59</sup>.

298 An experience shared by a very large number of women of childbearing age is an emotional lability  
299 during the luteal phase, in the days immediately before the menstruation<sup>60</sup>. This condition can take  
300 on clinical relevance in the form of PMS or even grow to a dysphoric clinical picture as in the case  
301 of PMDD<sup>16,17</sup>. A number of studies have investigated the role of sex hormones in PMS/PMDD, but  
302 no abnormal levels have been established<sup>61,62</sup> although with inconsistency<sup>63</sup>. At moment, the  
303 hypothesis with the stronger consensus claims a maladaptive response of the brain regions involved  
304 in affective processes to the physiological fluctuations of the sex hormones<sup>64</sup>. PMS/PMDD would  
305 result from an imbalance between bottom-up processes, involving the amygdala and the insular  
306 cortex, and top-down regulation through the prefrontal and cingulate cortices. In this study, we  
307 sought to provide evidence about the possible correlation between clinically under-threshold  
308 affective modifications and both topological changes and sex hormone fluctuations observed along  
309 the menstrual cycle. We showed a positive association between the BC values of rPCG and the  
310 subjective well-being in the environmental mastery and self-acceptance sub-domains of the Ryff's  
311 test. Furthermore, we showed a correlation between the environmental mastery sub-domain of the  
312 Ryff's test and estradiol levels. Our data demonstrate that during the ovulatory phase, when  
313 estradiol reaches its peak, the BC values of the rPCG peak as well. At same time, the affective state  
314 correlates positively with both the BC of the rPCG and estradiol blood levels. The combination of  
315 these observations (the positive correlation between the BC of the rPCG and both sex hormones and  
316 affective state, and the correlation between estradiol and affective condition) suggests that the sex  
317 hormones interfere with the affectivity, possibly by changing the topological features of the rPCG, a  
318 brain region specifically involved in the top-down computation of emotional stimuli<sup>34</sup>.

319 In conclusion, the responsiveness to affective and emotional stimuli is not constant. Rather, it may  
320 be accentuated or attenuated during the menstrual cycle perhaps via the modulation of the sex  
321 hormones, through mechanisms acting at different levels, including rearrangements of the large-scale

322 functional architecture of the brain. The results we present provide relevant information for all the  
323 studies that use brain topological indices to compare multiple groups. In fact, provided that the  
324 topological parameters are influenced by the hormonal profile, at least in women, this information  
325 should be taken into consideration to avoid a biased comparison.

326

## 327 **Conclusions**

328 In conclusion, we have shown that during the ovulatory phase an increase in the values of BC in the  
329 rPCG occurs. The changes in BC correlate positively with the estradiol, LH and FSH blood levels,  
330 all of which have their concentration peak in the ovulatory phase. The multilinear regression  
331 analysis confirmed that there is a strong relationship between the topological variation and estradiol.  
332 We have also highlighted how high BC values in the rPCG are linked to a better affective condition  
333 as suggested by the positive correlation with tests that evaluate the well-being in the dimensions of  
334 environmental mastery (and self-acceptance) that, in turn, is correlated to the estradiol levels.  
335 Finally, our work has widespread implications for all clinical neuroimaging studies, given that the  
336 comparison between groups should account for the physiological variations in the brain topology  
337 that occur in women throughout the menstrual cycle

338

## 339 **Methods**

340 **Participants.** Twenty-six strictly right-handed, native Italian speaker females were recruited (Tab.  
341 1). We included women with a regular menstrual cycle (mean cycle length  $28.4 \pm 1.3$  days), who  
342 had not make use of hormonal contraceptives (or other hormone regulating medicaments) during  
343 the last six months before the recording, who had not been pregnant in the last year and, finally,  
344 without history of neuropsychiatric diseases or premenstrual dysphoric/depressive symptoms. To  
345 check for mood and/or anxiety symptoms, the Beck Depression Inventory (BDI)<sup>65</sup> and Beck  
346 Anxiety Inventory (BAI)<sup>66</sup> were used with a cut-off below 10 and 21, respectively. To control for

347 influence of circadian rhythm, the time of testing varied no more than two hours between testing  
348 sessions. To control for a possible session effect, women were randomized according to the cycle  
349 phase at the first session.

350

351 **Experimental protocol.** At enrolment, all women signed a written consent form. All the procedures  
352 strictly adhered to the guidelines outlined in the Declaration of Helsinki, IV edition. The study  
353 protocol was approved by the local ethic committee (University of Naples Federico II; protocol n.  
354 223/20). Demographic and anamnestic data were collected and recorded on a dedicated database  
355 (Tab. 1). The women were tested in three different cycle phases, i.e. in the early follicular phase  
356 (cycle day 1-4, low estradiol and progesterone, T1), during the ovulatory phase (cycle day 13-15,  
357 high estradiol, T2) and in luteal phase (cycle day 21-23, high estradiol and progesterone, T3). To  
358 estimate individual cycle phases, the back-counting method was applied. Self-reported onset of  
359 menses was used as a starting point. During the three times cycle, all subjects underwent the  
360 following examinations: MEG recording, blood sampling for the hormone dosage and  
361 psychological evaluation. During the follicular phase a transvaginal pelvic ultrasonography  
362 examination was performed. After the last MEG recording, a structural magnetic resonance imaging  
363 (MRI) was performed. Two subjects refused to execute the MRI scan and consequently the template  
364 was used for sources reconstruction.

365

366 **Ultrasound examination.** All participants underwent a transvaginal pelvic ultrasonography during  
367 the early follicular phase. Scans were performed using a 4-10 MHz endocavitary transducer (GE  
368 Healthcare, Milwaukee, WI). Patients were in lithotomy position with empty bladder. The uterus  
369 and both ovaries were visualized. The uterus was scanned using longitudinal and transverse plane,  
370 endometrial thickness was measured at the widest point in the longitudinal plane. Follicle number  
371 and diameters were assessed for each ovary. Presence of abnormal findings, such as endometrial  
372 polyps, myomas, ovarian cysts or other adnexal masses was addressed. None of the enrolled



373 patients presented abnormal findings and endometrial thickness and follicle diameters were  
374 consistent with the menstrual phase.

375

376 **Hormone assays.** Each participant underwent venous blood sampling during the three hormonal  
377 phases of the menstrual cycle. All women were asked to respect a 12-h fast before blood collection.  
378 Whole blood samples were collected in S-Monovette tubes (Sarstedt), containing gel with clotting  
379 activator in order to facilitate the separation of the serum from the cellular fraction, according to  
380 predetermined standard operating procedure<sup>67</sup>. To this aim, samples were centrifuged at 4000 rpm  
381 for 10 minutes, then the serum was collected, aliquoted in 1.5 ml tubes (Sarstedt) and stored at -80  
382 °C until the analysis. Determination of estradiol (range: 19,5-144,2 pg/ml (follicular phase); 63,9-  
383 356,7 pg/ml (ovulatory phase); 55,8-214,2 pg/ml (luteal phase); detection limit: 11,8 pg/mL; inter-  
384 assay coefficients of variation averaged: 1,9%; Intra-assay coefficients of variation averaged:  
385 4,9%), progesterone (range: ND-1,4 ng/ml (follicular phase); ND-2,5 ng/ml (ovulatory phase); 2,5-  
386 28,03 ng/ml (luteal phase); detection limit: 0,2 ng/ml; inter-assay coefficients of variation averaged:  
387 5,5%; intra-assay coefficients of variation averaged: 3,56%), LH (range: 1,9-12,5 mIU/ml  
388 (follicular phase); 8,7-76,3 mIU/ml (ovulatory phase); 0,5-16,9 mIU/ml (luteal phase); detection  
389 limit: 0,07 mIU/ml; inter-assay coefficients of variation averaged: 2,3%; intra-assay coefficients of  
390 variation averaged: 2,5%) and FSH levels (range: 2,5-10,2 mIU/ml (follicular phase); 3,4-33,4  
391 mIU/ml (ovulatory phase); 1,5-9,1 mIU/ml (luteal phase); detection limit: 0,3 mIU/ml; inter-assay  
392 coefficients of variation averaged: 1,2%; intra-assay coefficients of variation averaged: 1,9%) were  
393 measured by Advia Centaur XT Immunoassay System analyzer (Siemens) which uses competitive  
394 (estradiol) or direct (progesterone, FSH, LH) immunoassay and for quantification of reaction uses  
395 Chemiluminescent Acridinium Ester technology. The 2.5<sup>th</sup> and 97.5<sup>th</sup> percentiles were used to form  
396 reference limits with 90% confidence intervals, as provided by assay manufacturers<sup>68</sup>.

397



398 **MEG recording.** The MEG system was developed by the National Research Council (CNR),  
399 Pozzuoli, Naples, at Institute of Applied Sciences and Intelligent Systems “E. Caianiello”, and is  
400 placed inside a shielded room (AtB Biomag UG-Ulm–Germany). The MEG is equipped by 154  
401 magnetometers and 9 reference sensors located on a helmet<sup>69</sup>. Before each MEG session, four  
402 position coils were placed on the participant’s head and their position, as well as that of four  
403 anatomical landmarks, was digitized using Fastrak (Polhemus®)<sup>70</sup>. The coils were activated and  
404 localized at the beginning of each segment of registration. The magnetic fields were recorded for 7  
405 minutes, divided into two time intervals of 3’30’’, while the participants were sitting comfortably in  
406 an armchair in the cabin with their eyes closed, and were instructed not to think of something in  
407 particular. During the acquisition the electrocardiogram (ECG) and electro-oculogram (EOG)  
408 signals were also recorded<sup>71</sup>. The data were sampled at  $f_s = 1024$  Hz and a 4<sup>th</sup> order Butterworth  
409 IIR pass-band filter between 0.5 and 48 Hz was applied. After each session, all the subjects were  
410 checked for drowsiness during the recording with a specific questionnaire.

411

412 **Data processing and source reconstruction.** After the recording phase, the brain magnetic signals  
413 were cleaned through an automated process as described in our previous article<sup>72</sup>. The FieldTrip  
414 software tool<sup>73</sup>, based on Mathworks® MATLAB, was used to implement principal component  
415 analysis (PCA)<sup>74,75</sup>, to reduce the environmental noise, and independent component analysis  
416 (ICA)<sup>76</sup>, to remove physiological artefacts such as cardiac noise or eyes blinking (if present). For  
417 each participant, source reconstruction was performed for all segments through a beamforming  
418 procedure using the Fieldtrip toolbox similarly to Jacini et al.<sup>77</sup>. In short, based on the native MRI,  
419 the volume conduction model proposed by Nolte<sup>78</sup> was applied and the Linearity Constrained  
420 Minimum Variance beamformer<sup>79</sup> was implemented to reconstruct time series related to the  
421 centroids of 116 regions-of-interest (ROIs), derived from the Automated Anatomical Labeling

422 (AAL) atlas<sup>80,81</sup>. We only considered the first 90 ROIs, excluding those corresponding to  
423 cerebellum, given that the reconstructed signal might be less reliable.

424

425 **Construction of brain network.** After the signal had been filtered in each canonical frequency  
426 band (i.e. delta, theta, alpha, beta and gamma – see later), the Phase Linearity Measurement  
427 (PLM)<sup>82</sup> was computed, to provide an estimate of synchronization between any two region that is  
428 purely based upon the phases of the signals, and unaffected by volume conduction. The PLM is  
429 defined as<sup>31</sup>:

430

$$PLM = \frac{\int_{-B}^B \left| \int_0^T e^{i\Delta\phi(t)} e^{-i2\pi f t} dt \right|^2 df}{\int_{-\infty}^{\infty} \left| \int_0^T e^{i\Delta\phi(t)} e^{-i2\pi f t} dt \right|^2 df}$$

431

432 where the  $\Delta\phi(t)$  represent the phase difference between two signals, the 2B is the frequency band  
433 range, set to 1 Hz,  $f$  is the frequency and  $T$  is the observation time interval.

434 The PLM was performed for segments longer than 4s. By computing the PLM for each couple of  
435 brain regions, we obtained a 90×90 weighted adjacency matrix for each time series and for each  
436 subject, in all frequency bands: delta (0.5–4 Hz), theta (4.0–8.0 Hz), alpha (8.0–13.0 Hz), beta  
437 (13.0–30.0 Hz) and gamma (30.0–48.0 Hz). Each weighted adjacency matrix was used to  
438 reconstruct a brain network<sup>32</sup>, where the 90 areas of the AAL atlas are represented as nodes, and the  
439 PLM values form the weighted edges. For each trials longer than 4s, and for each frequency band,  
440 through Kruskal’s algorithm<sup>83</sup>, the minimum spanning tree (MST) was calculated. The MST is a  
441 loop-less graph with N nodes and M = N-1 links. The MST was computed to be able to compare  
442 topological properties in an unbiased manner<sup>32,33</sup>.

443

444 **Graph analysis.** Global and nodal (regional) parameters were calculated. In order to characterize  
445 the global topological organization of the brain networks, four topological parameters were

446 calculated. The *leaf fraction* (Lf)<sup>42</sup>, defined as the fraction of nodes with a degree of 1, provides an  
447 indication of the integration of the network, with high leaf fraction conveying a more integrated  
448 network. The *degree divergence* (K)<sup>42</sup>, a measure of the broadness of the degree distribution, is  
449 related to the resilience against targeted attacks. The *tree hierarchy* (Th)<sup>42</sup> is defined as the number  
450 of leaf over the maximum betweenness centrality, and is meant to capture the optimal trade-off  
451 between network integration and resiliency to hub failure. Finally, the *diameter*<sup>42</sup> is defined as the  
452 longest shortest path of an MST, and represent a measure of ease of communication flow across a  
453 network. To examine the relative importance of specific brain areas in the brain network, two  
454 centrality parameters were calculated: the *degree*<sup>33</sup>, defined as the number of edges incident on a  
455 given node, and the *betweenness centrality* (BC)<sup>33</sup>, defined as the number of the shortest paths  
456 passing through a given node over the total of the shortest paths of the network. Before moving to  
457 the statistical analysis, all the metrics were averaged across epochs to obtain one value for subject.  
458 A pipeline of the processing MEG data is illustrated in Fig. 6.

459

460 **MRI acquisition.** MRI images of twenty-four participants were acquired on a 1.5-T Signa Explorer  
461 scanner equipped with an 8-channel parallel head coil (General Electric Healthcare, Milwaukee,  
462 WI, USA). In particular, three-dimensional T1-weighted images (gradient-echo sequence Inversion  
463 Recovery prepared Fast Spoiled Gradient Recalled-echo, time repetition = 8.216 ms, TI = 450 ms,  
464 TE = 3.08 ms, flip angle = 12, voxel size = 1×1×1.2 mm<sup>3</sup>; matrix = 256×256) were acquired. Two  
465 subjects refused to perform MRI scan and a standard template was used to sources reconstruction.

466

467 **Psychological evaluation.** The psychological assessments were carried out at each of the three  
468 menstrual cycle phases. In particular to quantify the self-esteem level, the Rosenberg Self-  
469 Esteem Scale<sup>84,85</sup> was used. Additionally the Ryff's test<sup>86</sup> was administrated to examine the  
470 psychological well-being of all participants. Finally, in addition to BAI<sup>66</sup> and BDI<sup>65</sup> tests  
471 administrated at the first experimental session (as inclusion/exclusion criteria), the tests were re-

472 administrated at each time point to exclude the appearance of depressive/anxious symptoms. Two  
473 women were excluded because the BDI test value had dropped below the cut-off.

474

475 **Statistical analysis.** Statistical analysis was performed using MATLAB (Mathworks®, version  
476 R2013a). The normal distribution of variables was checked through the Shapiro-Wilk test. In order  
477 to compare, in all frequency bands, the topological data among the three phases of the menstrual  
478 cycle, we used the Friedman test. All the  $p$  values were corrected for multiple comparison using the  
479 false discovery rate across parameters for each frequency bands (FDR)<sup>87</sup>. Subsequently, the post-  
480 hoc analysis was carried out using Wilcoxon test. The statistical significance was defined as  $p <$   
481 0.05.

482 If a topological parameter was statistically different in a time point of the menstrual cycle (as  
483 compared to the other time points), we went on to check if its variation across the time points were  
484 proportional to the hormonal variations. To do this, we calculated the delta values ( $\Delta$ ), expressed by  
485 the variations between the menstrual cycle phases ( $\Delta$  T1-T2 and  $\Delta$  T2-T3) for the topological  
486 parameters (namely, the BC in the right posterior cingulate gyrus, the Lf and the Th), and the  
487 hormonal variations (estradiol, FSH, LH, and progesterone) across the same time-points. Finally,  
488 the changes of the scores of the psychological tests (self-esteem and well-being with the six relative  
489 subdomains) were related to the topological changes, as well as to the hormonal variations. The  
490 correlation analysis was performed through the Spearman's correlation test, and the  $p$  values were  
491 corrected for multiple comparisons using FDR across metrics and frequency bands. A (corrected)  $p$   
492 value  $< 0.05$  was accepted as significant.

493 To test the hypothesis that, during the menstrual cycle, the hormonal changes provoke the  
494 topological changes, we build a linear model to predict the topological values based on hormones.  
495 Specifically, we considered the topological variation ( $\Delta$  T1-T2 and  $\Delta$  T2-T3) as the dependent  
496 variable, while estradiol, progesterone, LH, FSH\_variation ( $\Delta$  T1-T2 and  $\Delta$  T2-T3) were set as  
497 predictors. Moreover, in order to take into account for the possible effects of age, education and

498 menstrual cycle length, we added these three nuisance variables as predictors too. To make the  
499 prediction of our model more reliable and to test its generalization capacity, we used a leave-one-  
500 out cross-validation (LOOCV) technique. Expressly, we built  $n$  multilinear model (where  $n$  is the  
501 size of the sample included in the model), excluding each time a different element from the model,  
502 and verifying the ability of the model to predict the topological value of the excluded element.

503

## 504 **Data Availability**

505 The data used to support the findings of this study are available from the corresponding author upon  
506 request.

507

## 508 **Acknowledgments**

509 The present research was supported by the University of Naples Parthenope “Ricerca locale” (GS).

510

## 511 **Author contributions**

512 M. L. collected the sample, performed the MEG recordings, analysed the data, wrote the manuscript  
513 and prepared the figures. E. TL. performed the MEG recordings, designed the multilinear model,  
514 analysed the data and wrote the manuscript. L. S. performed the ultrasound examination. R. R.  
515 performed the MEG recordings and contributed to data analysis. R. M. performed the MEG  
516 recordings. M. P. collected the psychological data. G. P. and P. F. performed the pre-processing of  
517 hormones assay. F. L. provided critical revisions of manuscript. G. S. collected the venous blood  
518 sampling, contributed to interpreting the results and wrote the manuscript. P. S. supervised the  
519 study, designed the multilinear model, contributed to interpreting the results and wrote the  
520 manuscript.

521

## 522 **Competing interests**

523 The authors declare that there is no conflict of interest regarding the publication of this paper.

524

525

## 526 **References**

527 1. Sporns, O. *Translational research*. 111–121 (2018).

528 2. delEtoile, J. & Adeli, H. Graph Theory and Brain Connectivity in Alzheimer’s Disease.  
529 *Neuroscientist* **23**, 616–626 (2017).

530 3. Sorrentino, P. *et al.* Brain functional networks become more connected as amyotrophic  
531 lateral sclerosis progresses: a source level magnetoencephalographic study. *NeuroImage*  
532 *Clin.* **20**, 564–571 (2018).

533 4. Kim, J. *et al.* Abnormal intrinsic brain functional network dynamics in Parkinson’s disease.  
534 *Brain* **140**, 2955–2967 (2017).

535 5. Mujica-parodi, L. R. *et al.* Diet modulates brain network stability , a biomarker for brain  
536 aging , in young adults. 1–8 (2020). doi:10.1073/pnas.1913042117

537 6. Krause, A. J. *et al.* The sleep-deprived human brain HHS Public Access. *Nat Rev Neurosci*  
538 **18**, 404–418 (2017).

539 7. Phoenix, C. H., Goy, R. W., Gerall, A. A. & Young, W. C. Organizing action of prenatally  
540 administered testosterone propionate on the tissues mediating mating behavior in the female  
541 guinea pig. *Endocrinology* **65**, 369–382 (1959).

542 8. Giedd, J. N. *et al.* Quantitative MRI of the temporal lobe, amygdala, and hippocampus in  
543 normal human development: ages 4–18 years. *J. Comp. Neurol.* **366**, 223–230 (1996).

544 9. Sowell, E. R., Trauner, D. A., Gamst, A. & Jernigan, T. L. Development of cortical and  
545 subcortical brain structures in childhood and adolescence: a structural MRI study. *Dev. Med.*

- 546 *Child Neurol.* **44**, 4–16 (2007).
- 547 10. van Duijvenvoorde, A. C. K., Westhoff, B., de Vos, F., Wierenga, L. M. & Crone, E. A. A  
548 three-wave longitudinal study of subcortical–cortical resting-state connectivity in  
549 adolescence: Testing age- and puberty-related changes. *Hum. Brain Mapp.* **40**, 3769–3783  
550 (2019).
- 551 11. Peper, J. S., van den Heuvel, M. P., Mandl, R. C. W., Pol, H. E. H. & van Honk, J. Sex  
552 steroids and connectivity in the human brain: A review of neuroimaging studies.  
553 *Psychoneuroendocrinology* **36**, 1101–1113 (2011).
- 554 12. Maki, P. M. & Henderson, V. W. Cognition and the menopause transition. *Menopause* **23**,  
555 803–805 (2016).
- 556 13. Yen, J. Y., Liu, T. L., Chen, I. J., Chen, S. Y. & Ko, C. H. Premenstrual appetite and  
557 emotional responses to foods among women with premenstrual dysphoric disorder. *Appetite*  
558 **125**, 18–23 (2018).
- 559 14. Guida, M. *et al.* Variations in sleep associated with different types of hormonal  
560 contraceptives. *Gynecol. Endocrinol.* **36**, 166–170 (2020).
- 561 15. Parry, B. L. & Haynes, P. Mood disorders and the reproductive cycle. *J. gender-specific*  
562 *Med. JGSM Off. J. Partnersh. Women’s Heal. Columbia* **3**, 53–58 (2000).
- 563 16. Parker, G. & Brotchie, H. Gender differences in depression. *Int. Rev. psychiatry* **22**, 429–436  
564 (2010).
- 565 17. Payne, J. L., Palmer, J. T. & Joffe, H. A reproductive subtype of depression: conceptualizing  
566 models and moving toward etiology. *Harv. Rev. Psychiatry* **17**, 72–86 (2009).
- 567 18. Wittchen, H.-U., Becker, E., Lieb, R. & Krause, P. Prevalence, incidence and stability of  
568 premenstrual dysphoric disorder in the community. *Psychol. Med.* **32**, 119 (2002).

- 569 19. Ryu, A. 3.1. 3 Menopause Gaynor Bussell. *Man. Diet. Pract.* 85 (2019).
- 570 20. Finger, S. The birth of localization theory. in *Handbook of clinical neurology* **95**, 117–128  
571 (Elsevier, 2009).
- 572 21. Tizard, B. Theories of brain localization from Flourens to Lashley. *Med. Hist.* **3**, 132–145  
573 (1959).
- 574 22. Petersen, N., Kilpatrick, L. A., Goharзад, A. & Cahill, L. Oral contraceptive pill use and  
575 menstrual cycle phase are associated with altered resting state functional connectivity.  
576 *Neuroimage* **90**, 24–32 (2014).
- 577 23. Arélin, K. *et al.* Progesterone mediates brain functional connectivity changes during the  
578 menstrual cycle-a pilot resting state MRI study. *Front. Neurosci.* **9**, 1–11 (2015).
- 579 24. Hjelmervik, H., Hausmann, M., Osnes, B., Westerhausen, R. & Specht, K. Resting states are  
580 resting traits - An fMRI study of sex differences and menstrual cycle effects in resting state  
581 cognitive control networks. *PLoS One* **9**, 32–36 (2014).
- 582 25. De Bondt, T. *et al.* Stability of resting state networks in the female brain during hormonal  
583 changes and their relation to premenstrual symptoms. *Brain Res.* **1624**, 275–285 (2015).
- 584 26. Brötzner, C. P., Klimesch, W., Doppelmayr, M., Zauner, A. & Kerschbaum, H. H. Resting  
585 state alpha frequency is associated with menstrual cycle phase, estradiol and use of oral  
586 contraceptives. *Brain Res.* **1577**, 36–44 (2014).
- 587 27. Syan, S. K. *et al.* Influence of endogenous estradiol, progesterone, allopregnanolone, and  
588 dehydroepiandrosterone sulfate on brain resting state functional connectivity across the  
589 menstrual cycle. *Fertil. Steril.* **107**, 1246-1255.e4 (2017).
- 590 28. Baillet, S. Magnetoencephalography for brain electrophysiology and imaging. *Nat. Neurosci.*  
591 **20**, 327–339 (2017).



- 592 29. Wilson, T. W., Heinrichs-Graham, E., Proskovec, A. L. & McDermott, T. J. Neuroimaging  
593 with magnetoencephalography: A dynamic view of brain pathophysiology. *Transl. Res.* **175**,  
594 17–36 (2016).
- 595 30. Buzsáki, G., Logothetis, N. & Singer, W. Scaling brain size, keeping timing: evolutionary  
596 preservation of brain rhythms. *Neuron* **80**, 751–764 (2013).
- 597 31. Baselice, F., Sorriso, A., Rucco, R. & Sorrentino, P. Phase Linearity Measurement: A Novel  
598 Index for Brain Functional Connectivity. *IEEE Trans. Med. Imaging* **38**, 873–882 (2019).
- 599 32. Stam, C. J. Modern network science of neurological disorders. *Nat. Rev. Neurosci.* **15**, 683–  
600 695 (2014).
- 601 33. Tewarie, P., van Dellen, E., Hillebrand, A. & Stam, C. J. The minimum spanning tree: An  
602 unbiased method for brain network analysis. *Neuroimage* **104**, 177–188 (2015).
- 603 34. Leech, R. & Smallwood, J. *The posterior cingulate cortex: Insights from structure and*  
604 *function. Handbook of Clinical Neurology* **166**, (Elsevier B.V., 2019).
- 605 35. Raichle, M. E. *et al.* A default mode of brain function. *Proc. Natl. Acad. Sci.* **98**, 676–682  
606 (2001).
- 607 36. Gusnard, D. A., Akbudak, E., Shulman, G. L. & Raichle, M. E. Medial prefrontal cortex and  
608 self-referential mental activity: relation to a default mode of brain function. *Proc. Natl. Acad.*  
609 *Sci.* **98**, 4259–4264 (2001).
- 610 37. Mason, M. F. *et al.* Wandering minds: the default network and stimulus-independent thought.  
611 *Science (80-. )*. **315**, 393–395 (2007).
- 612 38. Addis, D. R., Wong, A. T. & Schacter, D. L. Remembering the past and imagining the  
613 future: common and distinct neural substrates during event construction and elaboration.  
614 *Neuropsychologia* **45**, 1363–1377 (2007).

- 615 39. Hwang, R. J. *et al.* The resting frontal alpha asymmetry across the menstrual cycle: A  
616 magnetoencephalographic study. *Horm. Behav.* **54**, 28–33 (2008).
- 617 40. Baker, C. M. *et al.* A Connectomic Atlas of the Human Cerebrum-Chapter 8: The Posterior  
618 Cingulate Cortex, Medial Parietal Lobe, and Parieto-Occipital Sulcus. *Oper. Neurosurg.*  
619 (*Hagerstown, Md.*) **15**, S350–S371 (2018).
- 620 41. Sutton, S. K. & Davidson, R. J. Prefrontal brain asymmetry: A biological substrate of the  
621 behavioral approach and inhibition systems. *Psychol. Sci.* **8**, 204–210 (1997).
- 622 42. Boersma, M. *et al.* Growing trees in child brains: graph theoretical analysis of  
623 electroencephalography-derived minimum spanning tree in 5- and 7-year-old children reflects  
624 brain maturation. *Brain Connect.* **3**, 50–60 (2013).
- 625 43. Pletzer, B., Harris, T. A., Scheuringer, A. & Hidalgo-Lopez, E. The cycling brain: menstrual  
626 cycle related fluctuations in hippocampal and fronto-striatal activation and connectivity  
627 during cognitive tasks. *Neuropsychopharmacology* **44**, 1867–1875 (2019).
- 628 44. Protopopescu, X. *et al.* Hippocampal structural changes across the menstrual cycle.  
629 *Hippocampus* **18**, 985–988 (2008).
- 630 45. Pritschet, L. *et al.* Functional reorganization of brain networks across the human menstrual  
631 cycle. *Neuroimage* **220**, 117091 (2020).
- 632 46. Penton-Voak, I. S. & Chen, J. Y. High salivary testosterone is linked to masculine male  
633 facial appearance in humans. *Evol. Hum. Behav.* **25**, 229–241 (2004).
- 634 47. Roney, J. R., Hanson, K. N., Durante, K. M. & Maestripieri, D. Reading men’s faces:  
635 Women’s mate attractiveness judgments track men’s testosterone and interest in infants.  
636 *Proc. R. Soc. B Biol. Sci.* **273**, 2169–2175 (2006).
- 637 48. Proverbio, A. M. *et al.* Neural coding of cooperative vs. affective human interactions: 150 ms

- 638 to code the action's purpose. *PLoS One* **6**, e22026 (2011).
- 639 49. Phillips, M. L. *et al.* Investigation of facial recognition memory and happy and sad facial  
640 expression perception: an fMRI study. *Psychiatry Res. Neuroimaging* **83**, 127–138 (1998).
- 641 50. Adolphs, R. Cognitive neuroscience of human social behaviour. *Nat. Rev. Neurosci.* **4**, 165–  
642 178 (2003).
- 643 51. Rupp, H. A. *et al.* Neural activation in women in response to masculinized male faces:  
644 mediation by hormones and psychosexual factors. *Evol. Hum. Behav.* **30**, 1–10 (2009).
- 645 52. Penton-Voak, I. S. & Perrett, D. I. Female preference for male faces changes cyclically:  
646 Further evidence. *Evol. Hum. Behav.* **21**, 39–48 (2000).
- 647 53. Gangestad, S. W. & Simpson, J. A. The evolution of human mating: Trade-offs and strategic  
648 pluralism. *Behav. Brain Sci.* **23**, 573–587 (2000).
- 649 54. Pawlowski, B. & Jasienska, G. Women's preferences for sexual dimorphism in height  
650 depend on menstrual cycle phase and expected duration of relationship. *Biol. Psychol.* **70**,  
651 38–43 (2005).
- 652 55. Proverbio, A. M., Zani, A. & Adorni, R. Neural markers of a greater female responsiveness  
653 to social stimuli. *BMC Neurosci.* **9**, 56 (2008).
- 654 56. Pastor, M. C. *et al.* Affective picture perception: emotion, context, and the late positive  
655 potential. *Brain Res.* **1189**, 145–151 (2008).
- 656 57. Rozenkrants, B., Olofsson, J. K. & Polich, J. Affective visual event-related potentials:  
657 arousal, valence, and repetition effects for normal and distorted pictures. *Int. J.*  
658 *Psychophysiol.* **67**, 114–123 (2008).
- 659 58. Jones, B. C. *et al.* Effects of menstrual cycle phase on face preferences. *Arch. Sex. Behav.* **37**,  
660 78–84 (2008).

- 661 59. Roney, J. R. & Simmons, Z. L. Women's estradiol predicts preference for facial cues of  
662 men's testosterone. *Horm. Behav.* **53**, 14–19 (2008).
- 663 60. Campagne, D. M. & Campagne, G. The premenstrual syndrome revisited. *Eur. J. Obstet.*  
664 *Gynecol. Reprod. Biol.* **130**, 4–17 (2007).
- 665 61. Rubinow, D. R. & Schmidt, P. J. Premenstrual syndrome: a review of endocrine studies.  
666 *Endocrinologist* **2**, 47–54 (1992).
- 667 62. Dubol, M., Epperson, C. N., Lanzenberger, R., Sundström-Poromaa, I. & Comasco, E.  
668 Neuroimaging premenstrual dysphoric disorder: A systematic and critical review. *Front.*  
669 *Neuroendocrinol.* 100838 (2020).
- 670 63. Nevatte, T. & O'Brien, P. M. S. Bäckström T, Brown C, Dennerstein L, Endicott J,  
671 Epperson CN, Eriksson E. *Free. EW, Halbreich U al. ISPM D Consens. Manag. premenstrual*  
672 *Disord. Arch Womens Ment Heal.* **16**, 279–291 (2013).
- 673 64. Comasco, E. & Sundström-Poromaa, I. Neuroimaging the Menstrual Cycle and Premenstrual  
674 Dysphoric Disorder. *Curr. Psychiatry Rep.* **17**, (2015).
- 675 65. Beck, A. T., Steer, R. A. & Brown, G. K. Bdi-ii manual. (1996).
- 676 66. Beck, A. T. & Steer, R. A. Manual for the Beck anxiety inventory. *San Antonio, TX Psychol.*  
677 *Corp.* (1990).
- 678 67. Tuck, M. K. *et al.* Standard operating procedures for serum and plasma collection. *J*  
679 *Proteome Res* **8**, 113–117 (2010).
- 680 68. McEnroe, R. J. *et al.* Evaluation of precision of quantitative measurement procedures:  
681 approved guideline. *Wayne Clin. Lab. Stand. Inst.* (2014).
- 682 69. Rucco, R. *et al.* Mutations in the SPAST gene causing hereditary spastic paraplegia are  
683 related to global topological alterations in brain functional networks. *Neurol. Sci.* 1–6 (2019).

- 684 70. Lardone, A. *et al.* Mindfulness Meditation Is Related to Long-Lasting Changes in  
685 Hippocampal Functional Topology during Resting State: A Magnetoencephalography Study.  
686 *Neural Plast.* **2018**, (2018).
- 687 71. Gross, J. *et al.* Good practice for conducting and reporting MEG research. *Neuroimage* **65**,  
688 349–363 (2013).
- 689 72. Sorriso, A. *et al.* An automated magnetoencephalographic data cleaning algorithm. *Comput.*  
690 *Methods Biomech. Biomed. Engin.* **22**, 1116–1125 (2019).
- 691 73. Oostenveld, R., Fries, P., Maris, E. & Schoffelen, J. M. FieldTrip: Open source software for  
692 advanced analysis of MEG, EEG, and invasive electrophysiological data. *Comput. Intell.*  
693 *Neurosci.* **2011**, (2011).
- 694 74. De Cheveigné, A. & Simon, J. Z. Denoising based on time-shift PCA. *J. Neurosci. Methods*  
695 **165**, 297–305 (2007).
- 696 75. Sadasivan, P. K. & Narayana Dutt, D. SVD based technique for noise reduction in  
697 electroencephalographic signals. *Signal Processing* **55**, 179–189 (1996).
- 698 76. Barbati, G., Porcaro, C., Zappasodi, F., Rossini, P. M. & Tecchio, F. Optimization of an  
699 independent component analysis approach for artifact identification and removal in  
700 magnetoencephalographic signals. *Clin. Neurophysiol.* **115**, 1220–1232 (2004).
- 701 77. Jacini, F. *et al.* Amnestic mild cognitive impairment is associated with frequency-specific  
702 brain network alterations in temporal poles. *Front. Aging Neurosci.* **10**, 1–11 (2018).
- 703 78. Nolte, G. The magnetic lead field theorem in the quasi-static approximation and its use for  
704 magnetoencephalography forward calculation in realistic volume conductors. *Phys. Med.*  
705 *Biol.* **48**, 3637–3652 (2003).
- 706 79. Van Veen, B. D., Van Drongelen, W., Yuchtman, M. & Suzuki, A. Localization of brain

- 707 electrical activity via linearly constrained minimum variance spatial filtering. *IEEE Trans.*  
708 *Biomed. Eng.* **44**, 867–880 (1997).
- 709 80. Gong, G. *et al.* Mapping anatomical connectivity patterns of human cerebral cortex using in  
710 vivo diffusion tensor imaging tractography. *Cereb. Cortex* **19**, 524–536 (2009).
- 711 81. Hillebrand, A. *et al.* Direction of information flow in large-scale resting-state networks is  
712 frequency-dependent. *Proc. Natl. Acad. Sci. U. S. A.* **113**, 3867–3872 (2016).
- 713 82. Sorrentino, P., Ambrosanio, M., Rucco, R. & Baselice, F. An extension of Phase Linearity  
714 Measurement for revealing cross frequency coupling among brain areas. *J. Neuroeng.*  
715 *Rehabil.* **16**, 4–9 (2019).
- 716 83. Kruskal, J. B. On the shortest spanning subtree of a graph and the traveling salesman  
717 problem. *Proc. Am. Math. Soc.* **7**, 48–50 (1956).
- 718 84. Prezza, M., Trombaccia, F. R. & Armento, L. La scala dell'autostima di Rosenberg:  
719 Traduzione e validazione Italiana. *Giunti Organ. Spec.* (1997).
- 720 85. Rosenberg, M. *Society and the adolescent self-image.* (Princeton university press, 2015).
- 721 86. Ruini, C., Ottolini, F., Rafanelli, C., Ryff, C. D. & Fava, G. A. La validazione italiana delle  
722 Psychological Well-being Scales (PWB). *Riv. Psichiatr.* **38**, 117–130 (2003).
- 723 87. Benjamini, Y. & Hochberg, Y. Controlling the false discovery rate: a practical and powerful  
724 approach to multiple testing. *J. R. Stat. Soc. Ser. B* 289–300 (1995).

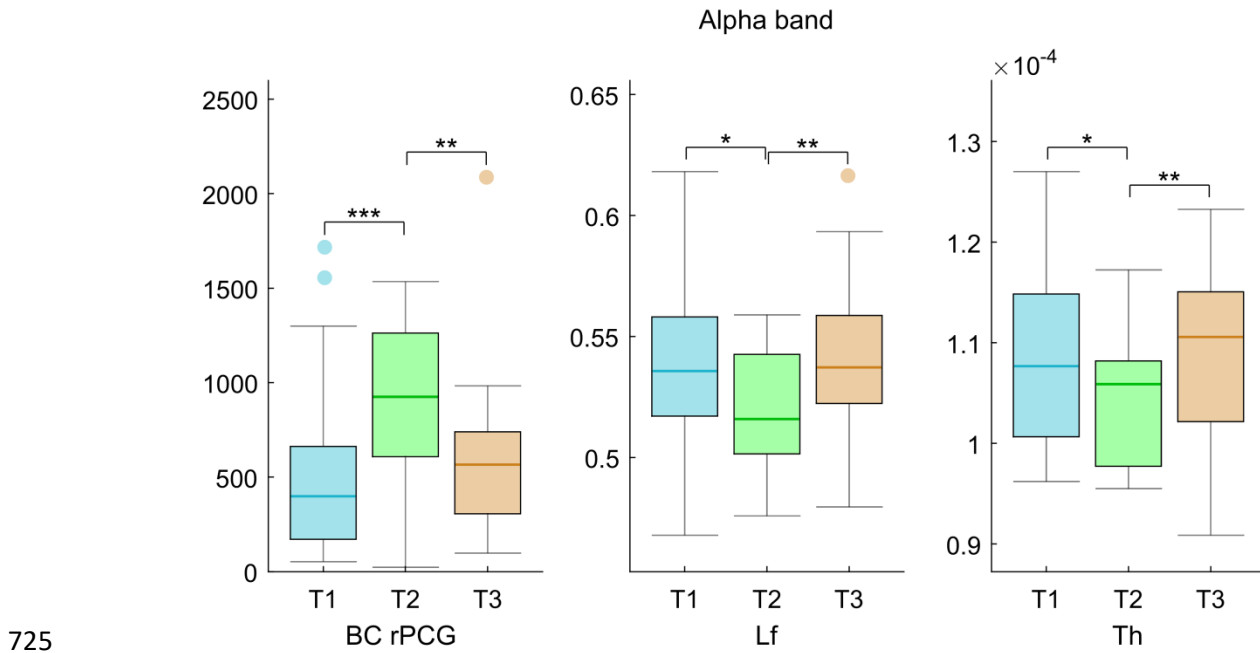

726 **Fig. 1 | Brain topology comparison.** The box plots refer to the alpha band, from left to right, to the  
727 BC in the rPCG, the leaf fraction (Lf) and the Tree hierarchy (Th), respectively. In each box plot,  
728 the values are shown at early follicular (T1), ovulatory (T2) and luteal (T3) phases. The upper and  
729 lower bound of the rectangles refer to the 25<sup>th</sup> to 75<sup>th</sup> percentiles, the median value is represented by  
730 horizontal line inside each box, the whiskers extent to the 10<sup>th</sup> and 90<sup>th</sup> percentiles, and further data  
731 are considered as outliers and represented by the filled circles. Significance  $p$  values: \* $p < 0.05$ , \*\* $p$   
732  $< 0.01$ , \*\*\* $p < 0.001$ .

733

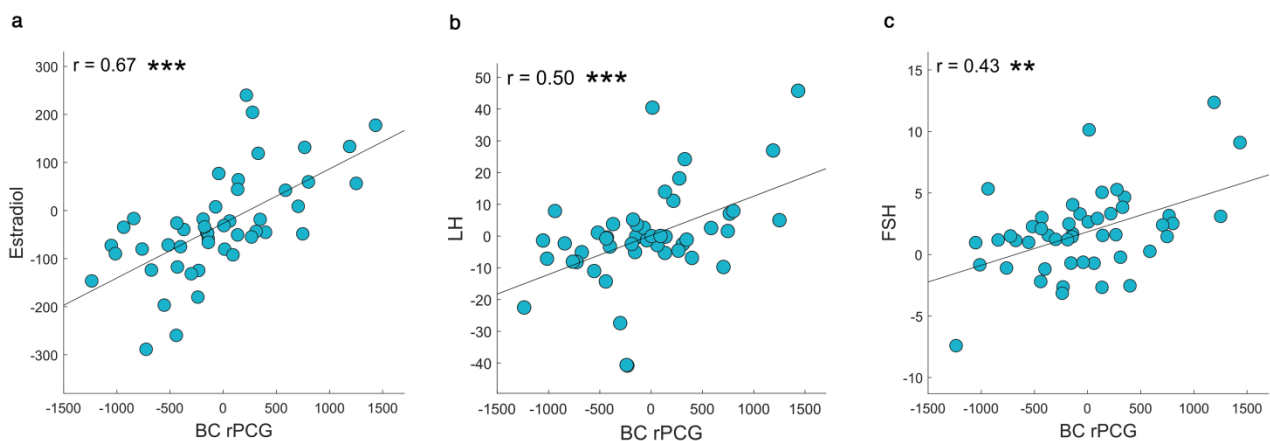

734

735 **Fig. 2| Correlation between topological data and hormones blood levels.** Spearman's correlation  
736 between the  $\Delta$  values (expressed by the variation between the menstrual cycle phases ( $\Delta$  t1-t2 and  $\Delta$   
737 T2-T3)) of betweenness centrality (BC) of the right posterior cingulate gyrus (PCG) and the  $\Delta$   
738 values of (a) estradiol, (b) luteinizing hormone (LH), and (c) follicular stimulant hormone (FSH)  
739 levels along the menstrual cycle. Significance  $p$  values: \* $p < 0.05$ , \*\* $p < 0.01$ , \*\*\* $p < 0.001$ .  
740

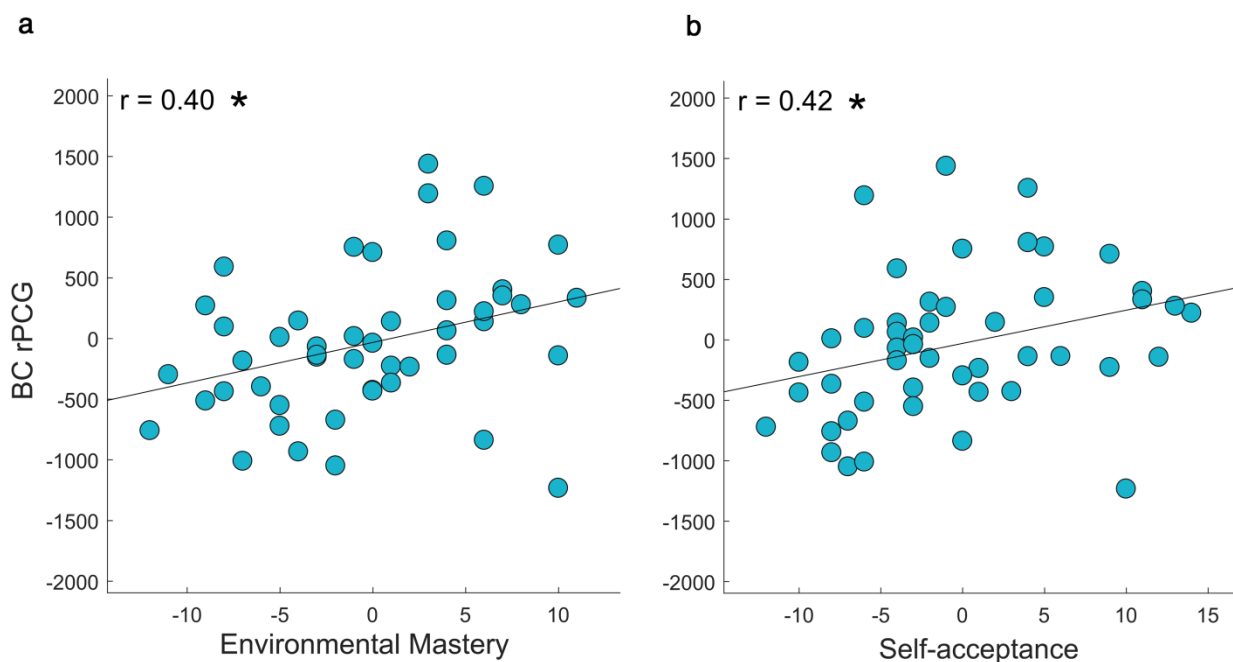

741  
742 **Fig. 3| Correlation between topological data and psychological dimensions of Well-Being test.**  
743 Spearman's correlation between the  $\Delta$  values (expressed by the variation between the menstrual  
744 cycle phases ( $\Delta$  T1-T2 and  $\Delta$  T2-T3)) of betweenness centrality (BC) of the right posterior  
745 cingulate gyrus (PCG) and the  $\Delta$  values of psychological dimensions of the Well-Being test ((a)  
746 Environmental Mastery and (b) and Self-acceptance scores) along the menstrual cycle.  
747 Significance  $p$  values: \* $p < 0.05$ , \*\* $p < 0.01$ , \*\*\* $p < 0.001$ .  
748  
749



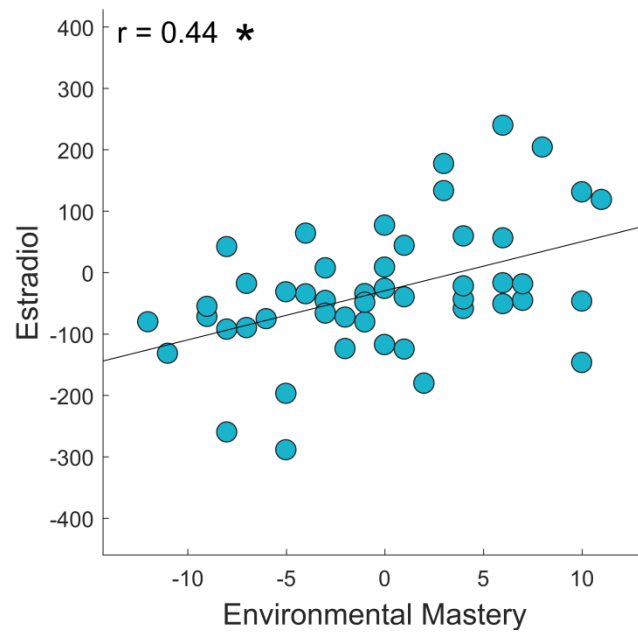

750

751 **Fig. 4| Correlation between hormones blood levels and psychological dimensions of Well-**  
752 **Being test.** Spearman's correlation between the  $\Delta$  values (expressed by the variation between the  
753 menstrual cycle phases ( $\Delta$  T1-T2 and  $\Delta$  T2-T3)) of Estradiol and the  $\Delta$  values of psychological  
754 dimension of Well-Being test (Environmental Mastery scores) along the menstrual cycle.  
755 Significance  $p$  value:  $*p < 0.05$ ,  $**p < 0.01$ ,  $***p < 0.001$ .

756

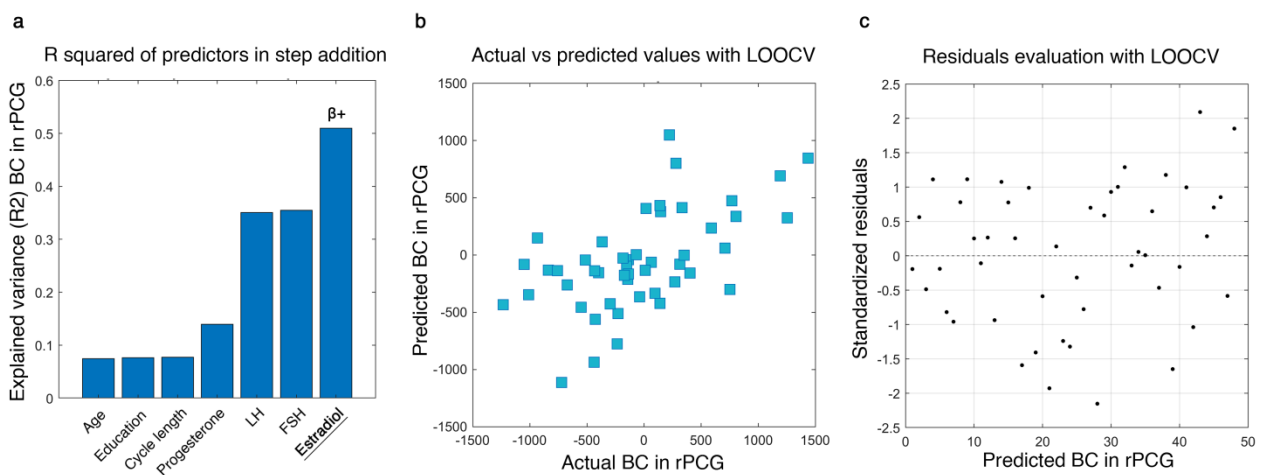

757

758 **Fig. 5| Multilinear model with leave-one-out cross-validation (LOOCV).** The model aims to  
759 predict the topological variation of the brain network expressed by the betweenness centrality (BC)

760 changes during the menstrual cycle ( $\Delta$  T1-T2 and  $\Delta$  T2-T3) of the right posterior cingulate gyrus  
761 (rPCG). **a**, Explained variance of the additive model composed of three nuisance variables (age,  
762 education, cycle length), and four predictors (progesterone, luteinizing hormone (LH), follicle-  
763 stimulating hormone (FSH), estradiol). Significant predictor in underlined text; positive coefficient  
764 indicated with  $\beta+$ . **b**, Scatter plot of the Observed topological values versus the topological values  
765 predicted by the model with LOOCV. **c**, Scatter plot of the standardized residuals (standardization  
766 of the difference between observed and predicted (LOOCV) values). The distribution results  
767 symmetrical with respect to the 0, with a standard deviation lower than 2.5.

768

769

| <b>Demographic and anamnestic data</b> |                                 |
|----------------------------------------|---------------------------------|
| <b><i>Parameters</i></b>               | <b><i>Participants (24)</i></b> |
| Age (years)                            | 26.2 $\pm$ 5.1                  |
| Education (years)                      | 17.1 $\pm$ 2.7                  |
| Menstrual cycle duration (days)        | 28.4 $\pm$ 1.3                  |

770 **Tab. 1| Demographic and anamnestic data.** Data are given as mean  $\pm$  standard deviation (SD).

771

772

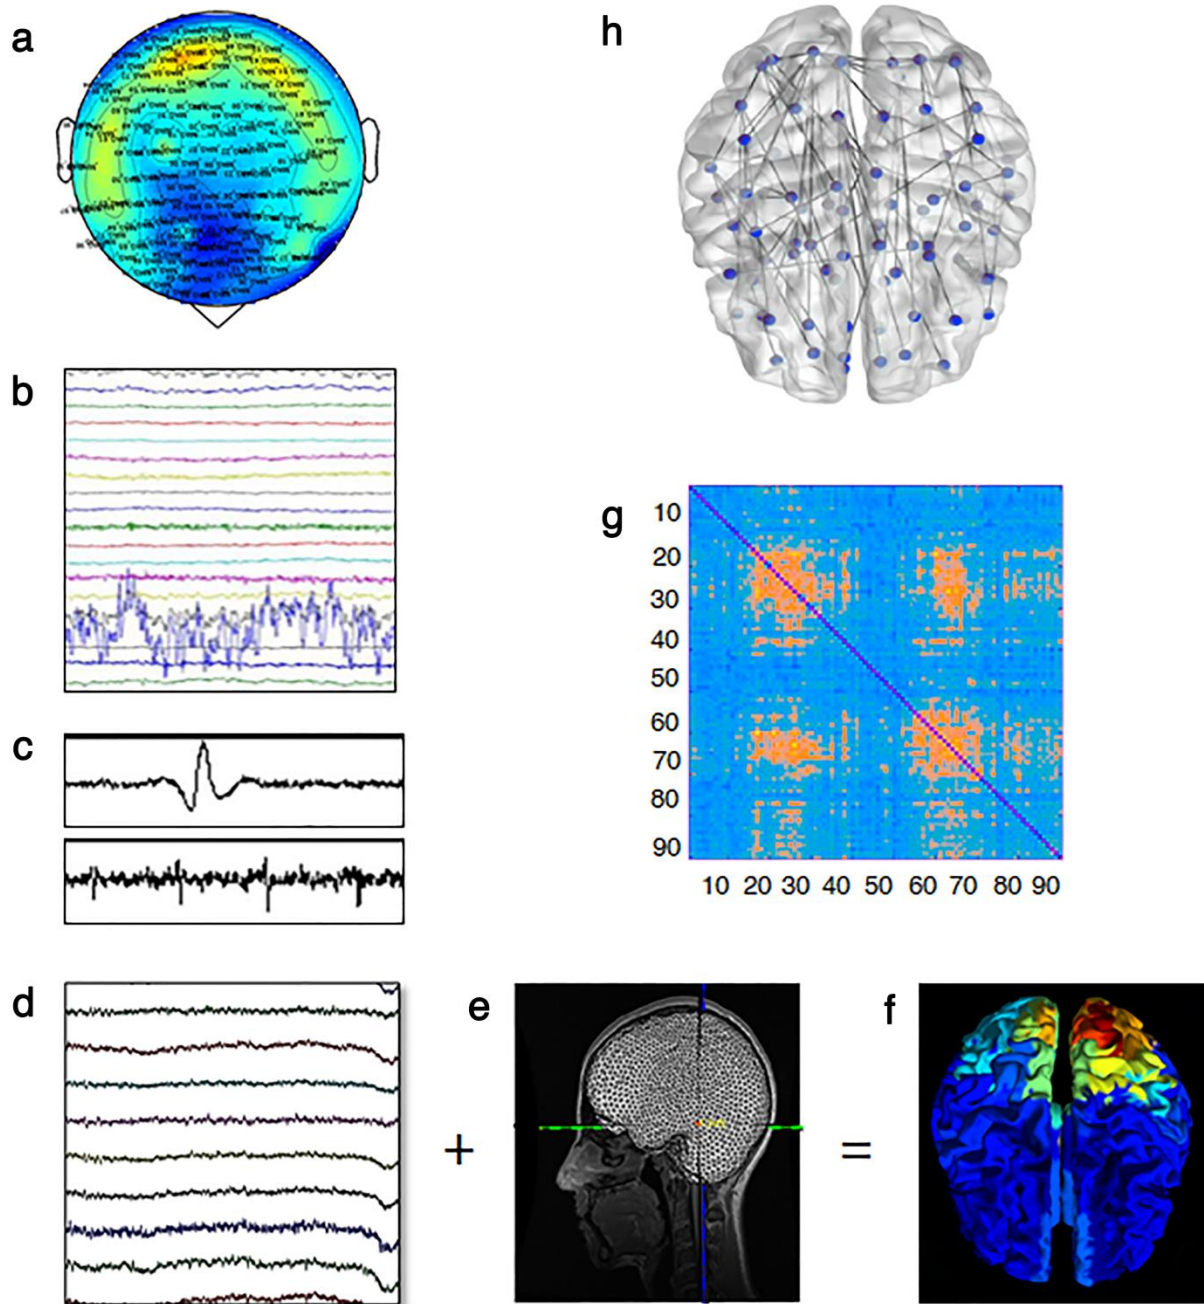

773

774 **Fig. 6| Data analysis pipeline. a**, Neuronal activity recorded by 163 sensors. **b**, Noisy channels  
775 identified by an experienced rater. **c**, Cardiac (upper) and blinking (lower) artefacts as estimated by  
776 ICA. **d**, Cleaned channels. **e**, Native MRI. **f**, Structural MRI and MEG sensors are co-registered and  
777 the time series are estimated in source space. **g**, Functional connectivity matrix estimated using the  
778 Phase Linearity Measurement. Rows and columns are the regions of interest, while the entries are  
779 the estimated values of the Phase Linearity Measurement. **h**, Brain topology representation based on  
780 the MST.
